# Supplementary material
Source: HighWire-hosted journal article supplement (https://tech.snmjournals.org/highwire/filestream/8643/field_highwire_adjunct_files/0/131995_Supplemental_Data.pdf)

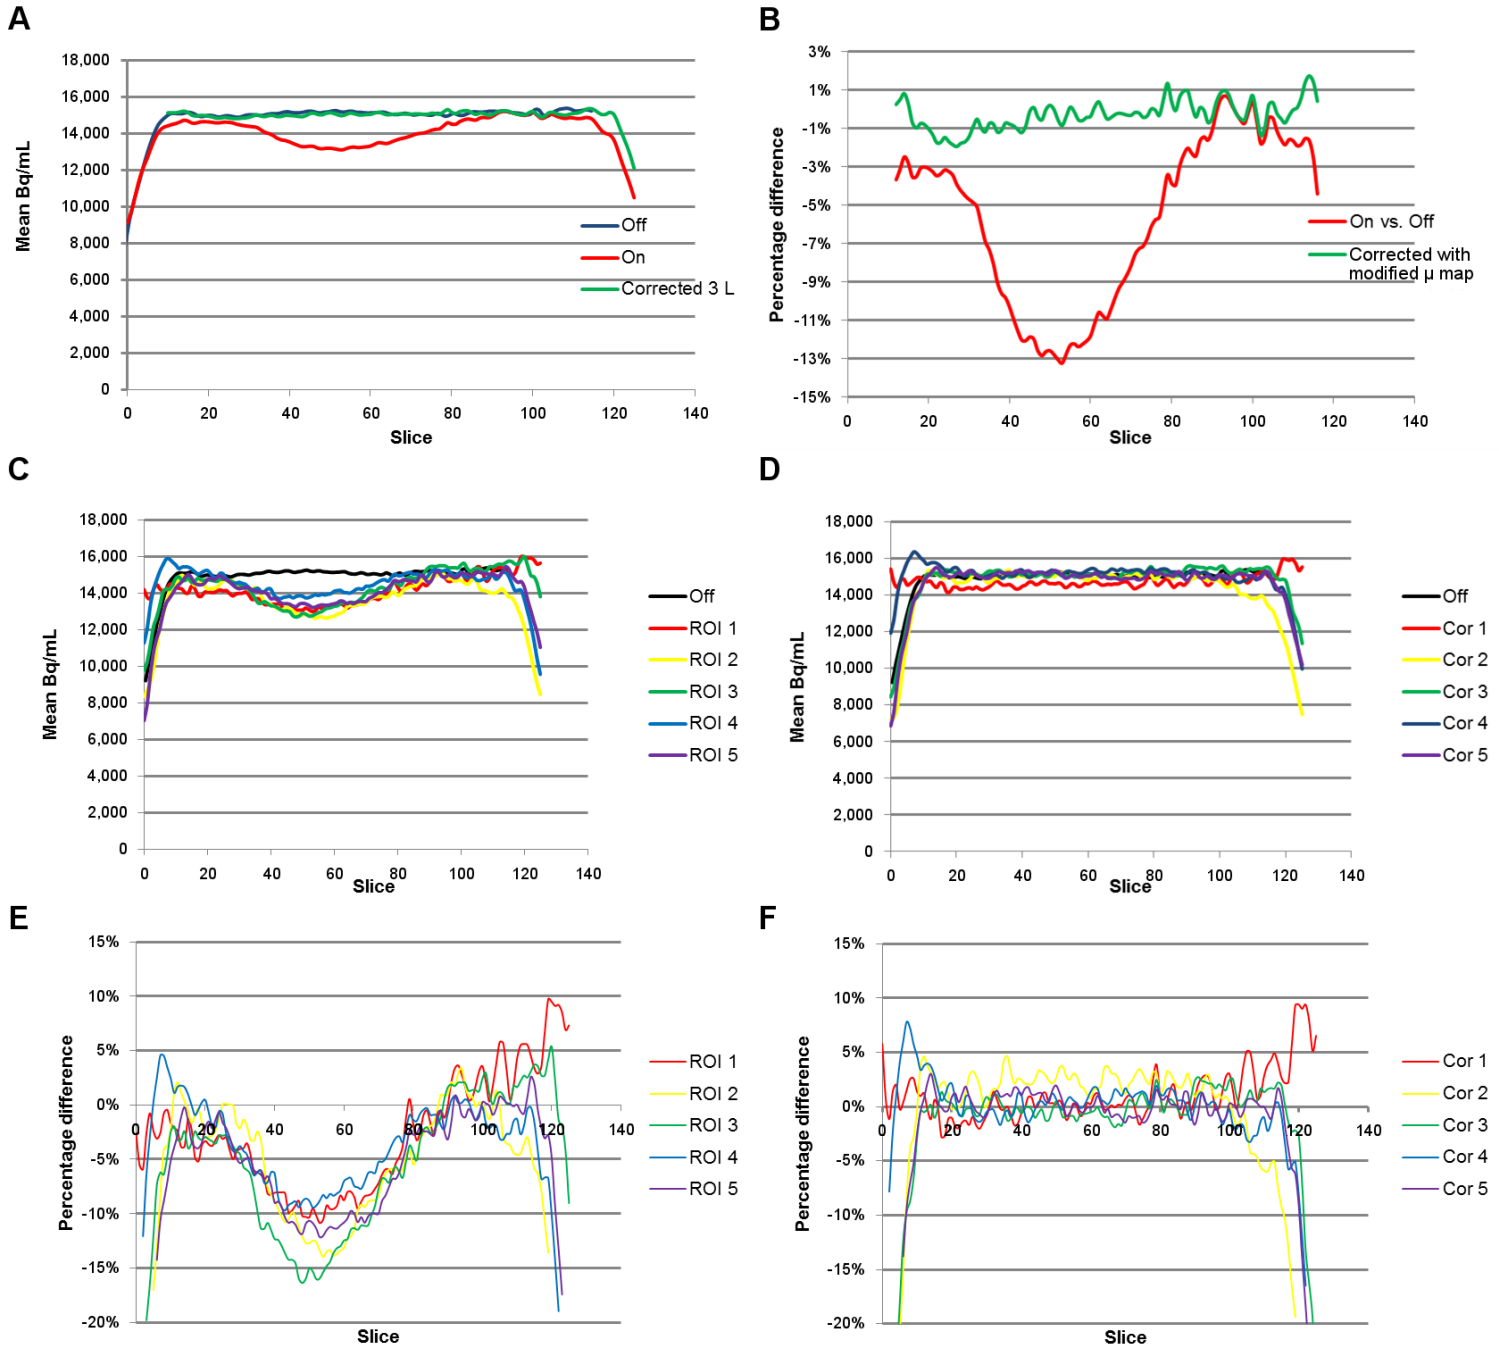

Color version of Figure 4.

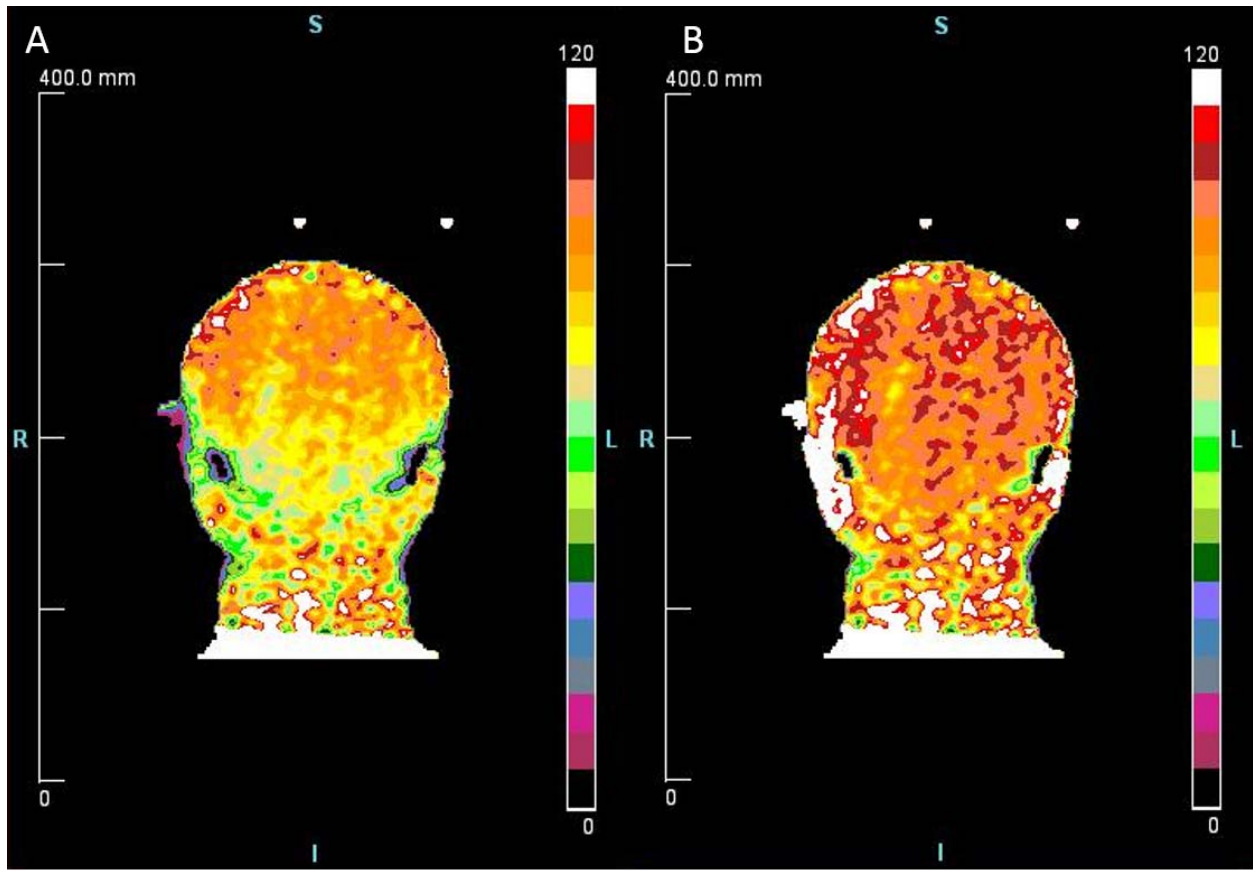

On vs. off

Corrected vs. off

Color version of Figure 6.

Supplement: 131995_Supplemental_Data.pdf [file 131995_Supplemental_Data.pdf]
